# Supplementary material
Source: PubMed Central journal article supplement (PMC5200860)

**Figure e-1.** Enlarged MR images of the affected frontal lobes of patient #1 (A) and patient #2 (B) both at baseline and follow-up. Arrows indicate the locations of the newly developed enlarged medullary veins on the follow-up images.

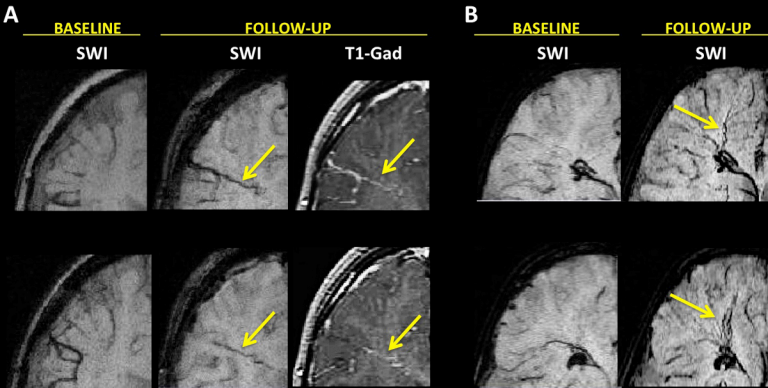

Supplement: supp_WNL.0000000000003455_Figure_e-1.pdf [file supp_WNL.0000000000003455_Figure_e-1.pdf]
